# Supplementary material
Source: PubMed Central journal article supplement (PMC7236306)

## Supplementary Figure 1

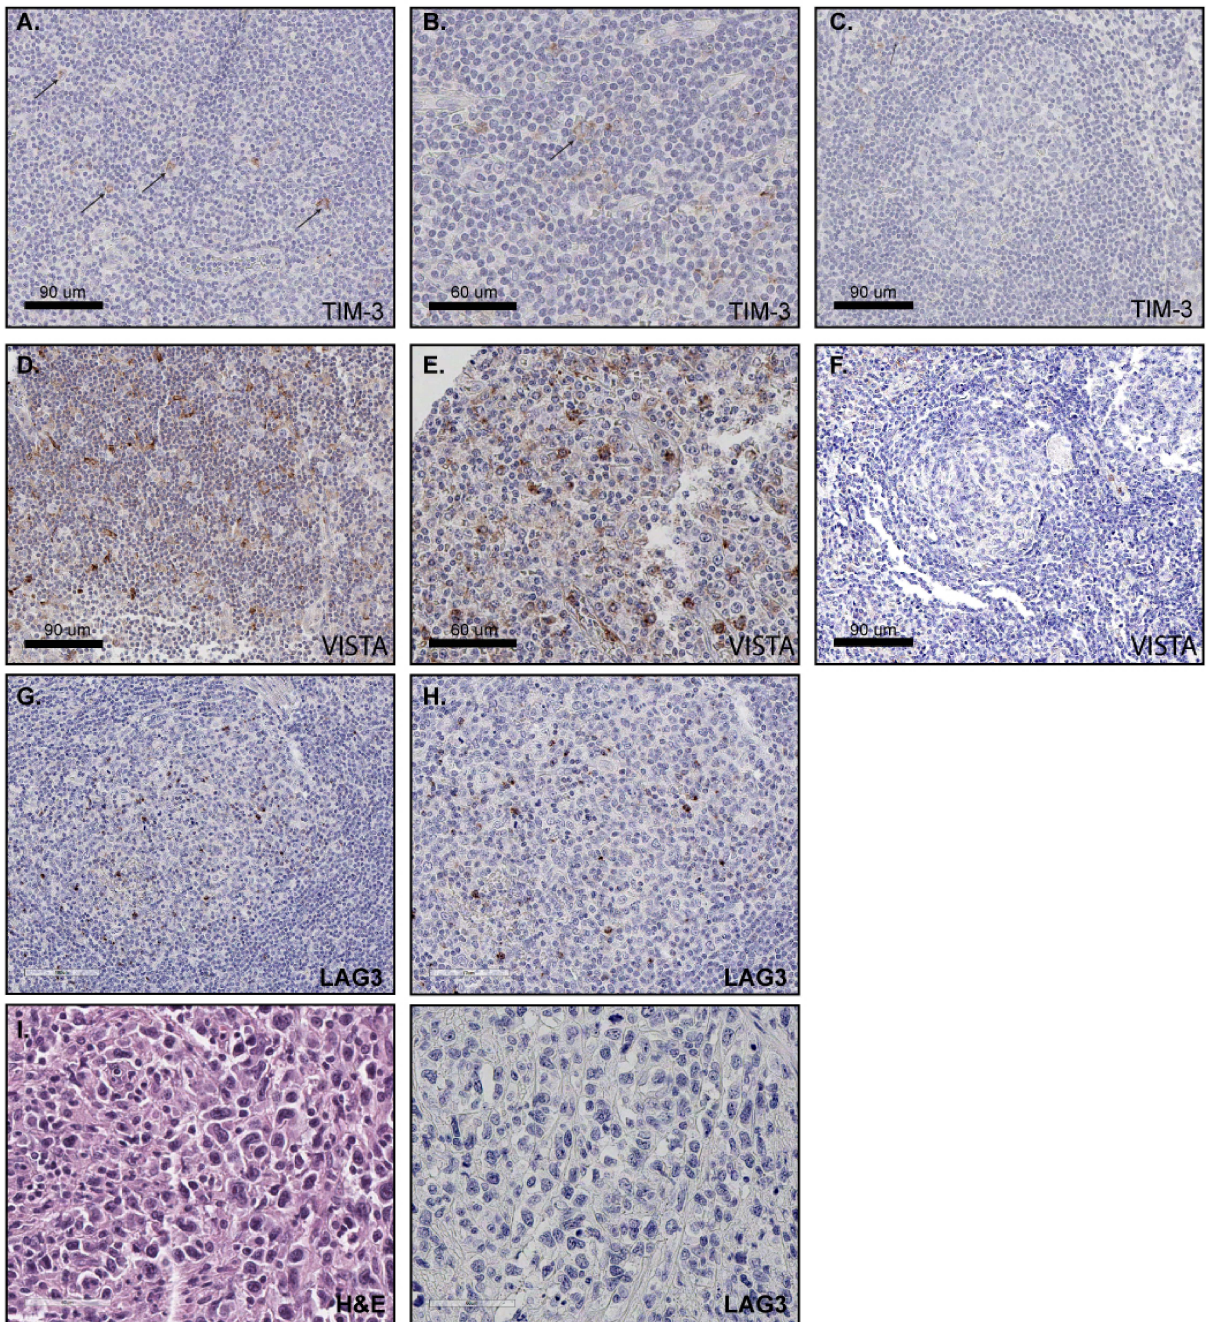

Supplement: NIHMS1579569-supplement-Supplemental_material.pdf [file NIHMS1579569-supplement-Supplemental_material.pdf]
